# Supplementary material for: Fuel-influenced nanorod-to-nanosphere transformation of vanadium-doped ZnO and its performance in dye-sensitized solar cells
Source: Royal Society of Chemistry journal article supplement (doi:10.1039/d4nj03589e), 2024-01-01
Supplement: d4nj03589e1.pdf [file d4nj03589e1.pdf]

**Nanorod to Nanosphere Transformation of Vanadium doped ZnO as  
influenced by Fuels and their Performance in Dye Sensitized Solar Cells**

**Sasikumar Kuppusamy<sup>a</sup>, Theanmozhi Mohan<sup>a</sup>, G. Gnana kumar<sup>b</sup>,**

**Chinnakonda S. Gopinath<sup>c</sup>, Arindam Saha<sup>c</sup> and Robin Jude Vimal Michael<sup>a\*</sup>**

*<sup>a</sup>Kinetics and Catalysis Lab (KCL), Abdul Kalam Research Centre (AKRC),*

*P.G. and Research Department of Chemistry, Sacred Heart College (Autonomous),*

*Tirupattur - 635601, Affiliated to Thiruvalluvar University, Serkkadu, Tamil Nadu, India.*

*<sup>b</sup>Department of Physical Chemistry, School of Chemistry, Madurai Kamaraj University,*

*Madurai 625 021, Tamil Nadu, India.*

*<sup>c</sup>Catalysis and Inorganic Chemistry Division, CSIR-National Chemical Laboratory,*

*Pune 411 008, India.*

**Supporting information:**

Number of Pages : 05

Number of Figures : 04

Number of Tables : 04

## FT-IR studies of pure and vanadium loaded ZnO nanocrystals

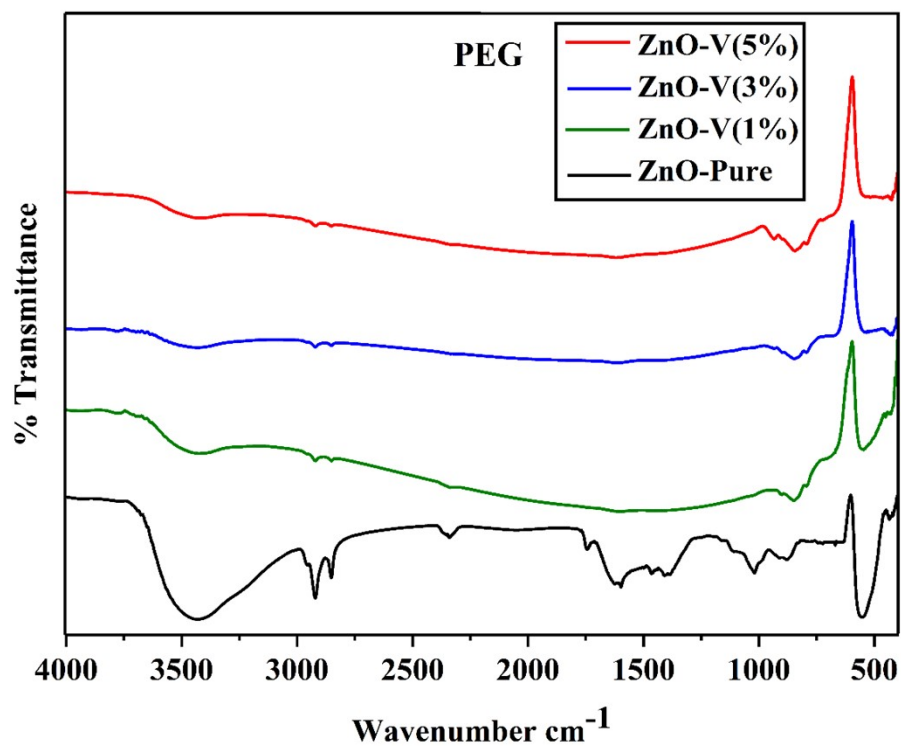

Figure S1. FTIR spectra of pure and vanadium loaded ZnO using PEG as fuel

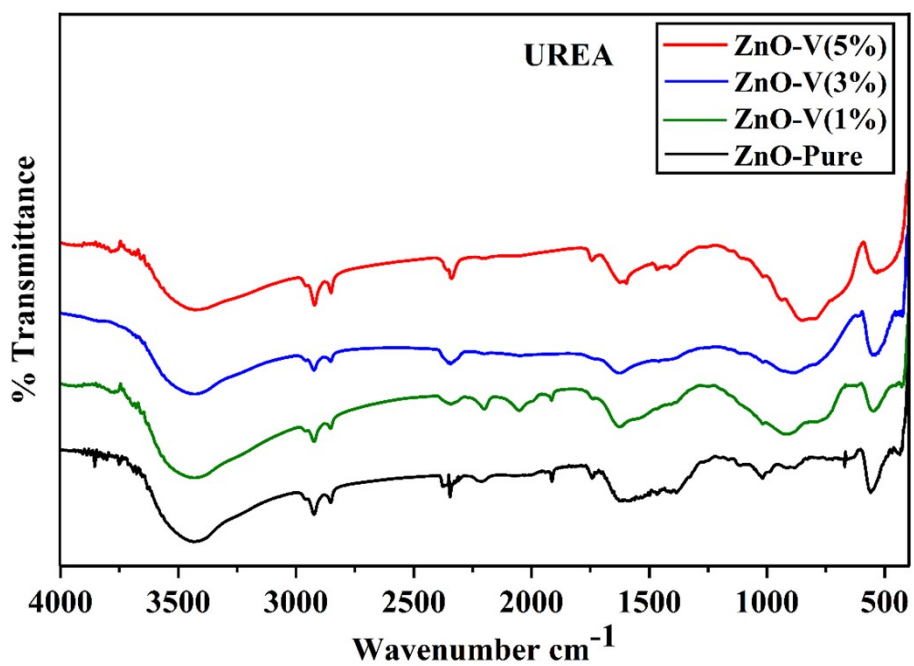

Figure S2. FTIR spectra of pure and vanadium loaded ZnO using urea as fuel

The FT-IR studies of the vanadium loaded and pure ZnO nanoparticles reveal the formation of Zinc and vanadium oxides and their corresponding stretching and bending vibration are observed and are given in Figure S1 and S2 for pure ZnO to ZnO-V (1%, 3%, and 5%) (PEG-400) and pure ZnO to ZnO-V (1%, 3%, and 5%) (Urea) respectively. From the FTIR study the peak at 554  $\text{cm}^{-1}$  indicates the presence of ZnO nanocrystals. The peak at 1017  $\text{cm}^{-1}$  indicates the presence of V=O stretching vibration frequency. There is a peak at 1396  $\text{cm}^{-1}$  denotes  $\text{CH}_3$  umbrella type bent of vibration. The peaks obtained in the range of 1400-1500  $\text{cm}^{-1}$  correspond to C=O bonds. Then the peak obtained at 1585  $\text{cm}^{-1}$  assigned O-H bending vibrations. The peak at 1395  $\text{cm}^{-1}$  and 1469  $\text{cm}^{-1}$  corresponds to C=O and O-H bending vibrations respectively. The peak at 2852 shows  $\text{CH}_3$  symmetric stretching vibration. Finally, the broad peak at 3430  $\text{cm}^{-1}$  indicates the O-H stretching vibration.

### X-Ray diffraction

**Table S1. d -spacing and lattice parameter for Pristine ZnO (PEG)**

| 2 $\Theta$ (degree) | $\Theta$ (degree) | $\sin \Theta$ | d (Å) | d-spacing<br>(nm) | hkl | Lattice parameter<br>(Å) |
|---------------------|-------------------|---------------|-------|-------------------|-----|--------------------------|
| 31.8                | 15.9              | 0.274         | 2.811 | 0.2811            | 100 | 5.1938 Å                 |
| 34.5                | 17.2              | 0.296         | 2.601 | 0.2601            | 002 |                          |
| 36.3                | 18.1              | 0.312         | 2.469 | 0.2649            | 101 |                          |
| 47.6                | 23.8              | 0.404         | 1.905 | 0.1905            | 102 |                          |
| 56.7                | 28.3              | 0.474         | 1.624 | 0.1624            | 110 |                          |
| 62.9                | 31.4              | 0.522         | 1.476 | 0.1476            | 103 |                          |
| 66.5                | 33.2              | 0.548         | 1.406 | 0.4060            | 200 |                          |
| 68.0                | 34.0              | 0.559         | 1.378 | 0.1378            | 112 |                          |
| 69.2                | 34.6              | 0.567         | 1.359 | 0.1359            | 201 |                          |

**Table S2. Crystallite size calculated from Debye–Scherrer equation**

| Samples    | Crystallite Size(nm) |      |
|------------|----------------------|------|
|            | PEG 400              | Urea |
| ZnO - Pure | 61                   | 49   |
| ZnO-V1%    | 53                   | 35   |
| ZnO-V3%    | 56                   | 43   |
| ZnO-V5%    | 58                   | 53   |

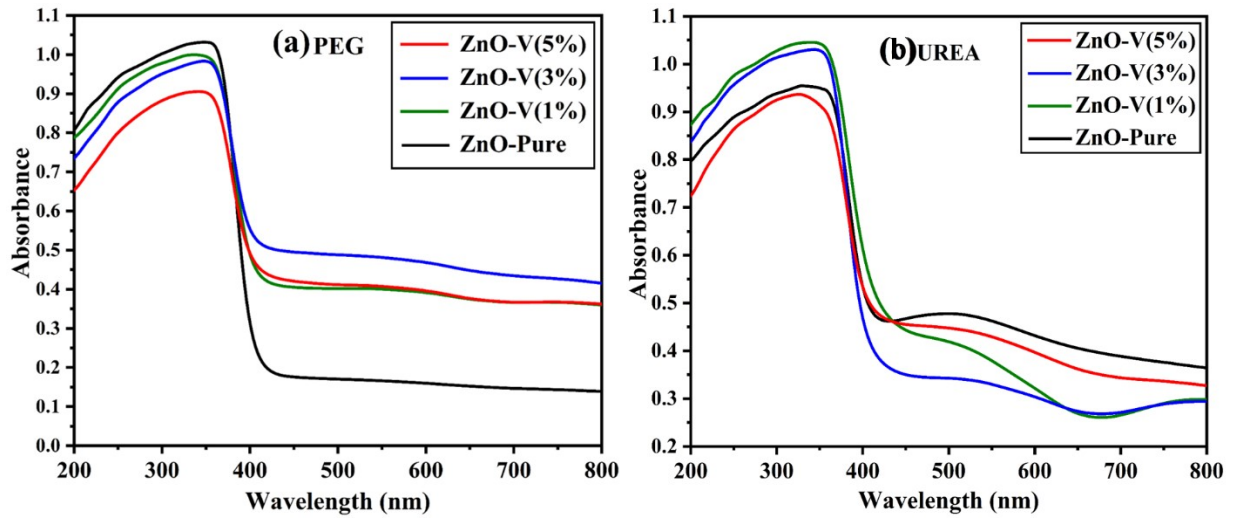

**Figure S3.** Absorbance spectra of (a) PEG and (b) Urea fuel samples.

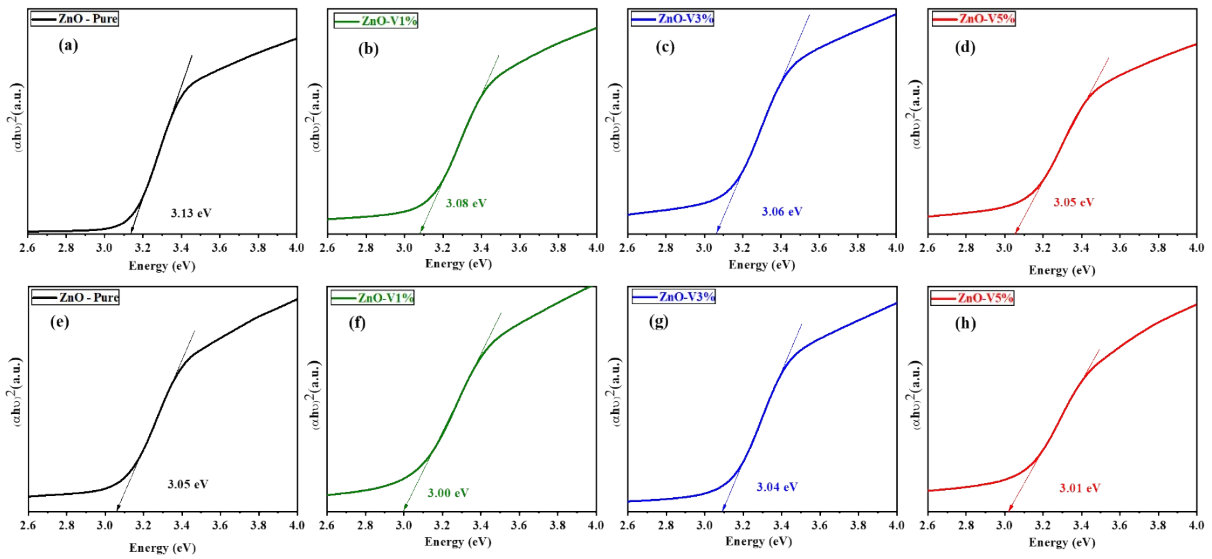

**Figure S4.** Tauc plot of PEG (a-d) and urea (e-h).

**Table S3. Bandgap calculated from Tauc plot method**

| <b>Bandgap (eV)</b> |                |             |
|---------------------|----------------|-------------|
| <b>Samples</b>      | <b>PEG 400</b> | <b>Urea</b> |
| ZnO - Pure          | 3.13           | 3.03        |
| ZnO-V1%             | 3.08           | 3.00        |
| ZnO-V3%             | 3.06           | 3.04        |
| ZnO-V5%             | 3.05           | 3.01        |

**Table S4. Fabricated DSSC device parameters from EIS analysis.**

| <b>DSSC Device</b> | <b><math>R_s(\Omega)</math></b> | <b><math>R_{ct}(\Omega)</math></b> | <b><math>R_{rec}(\Omega)</math></b> | <b><math>Z_w(\Omega)</math></b> | <b><math>f_{max}(\text{Hz})</math></b> | <b><math>\eta(\%)</math></b> |
|--------------------|---------------------------------|------------------------------------|-------------------------------------|---------------------------------|----------------------------------------|------------------------------|
| ZnO-V5% (PEG)      | 7.70                            | 0.71                               | 3.12                                | 11.53                           | 0.251                                  | 5.4                          |
| ZnO-V5% (Urea)     | 7.60                            | 0.64                               | 1.84                                | 10.08                           | 0.316                                  | 4.9                          |
| ZnO- Pure (PEG)    | 8.75                            | 0.72                               | 1.63                                | 11.10                           | 0.362                                  | 4.1                          |
| ZnO- Pure (Urea)   | 9.00                            | 0.52                               | 1.34                                | 10.86                           | 0.400                                  | 3.1                          |
